# Supplementary material for: Autophagy mediates grain yield and nitrogen stress resistance by modulating nitrogen remobilization in rice
Source: PubMed Central journal article supplement (PMC7808584; doi:10.1371/journal.pone.0244996), 2021-01-14

# Uncropped original image files for the immunoblots in Figure 2C

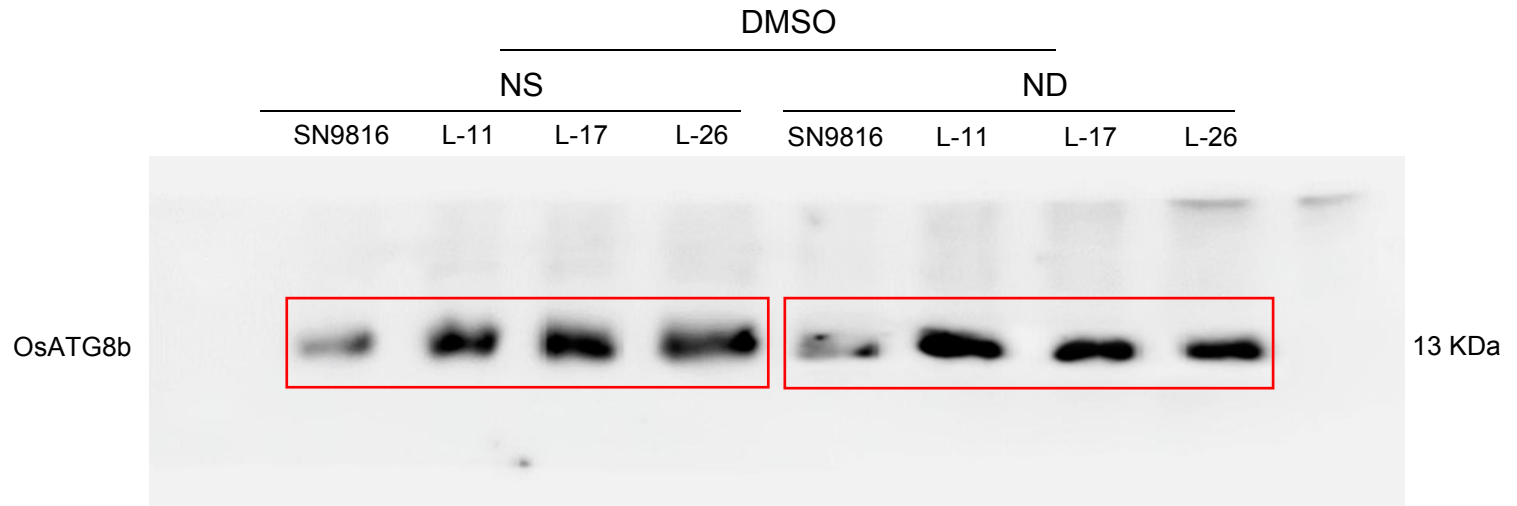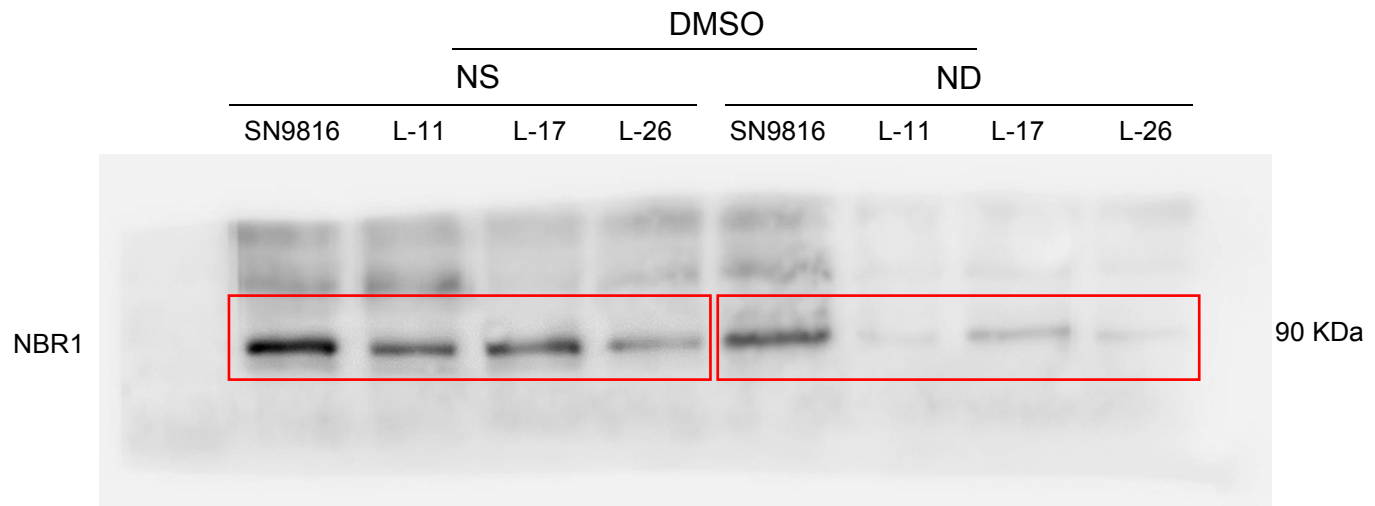

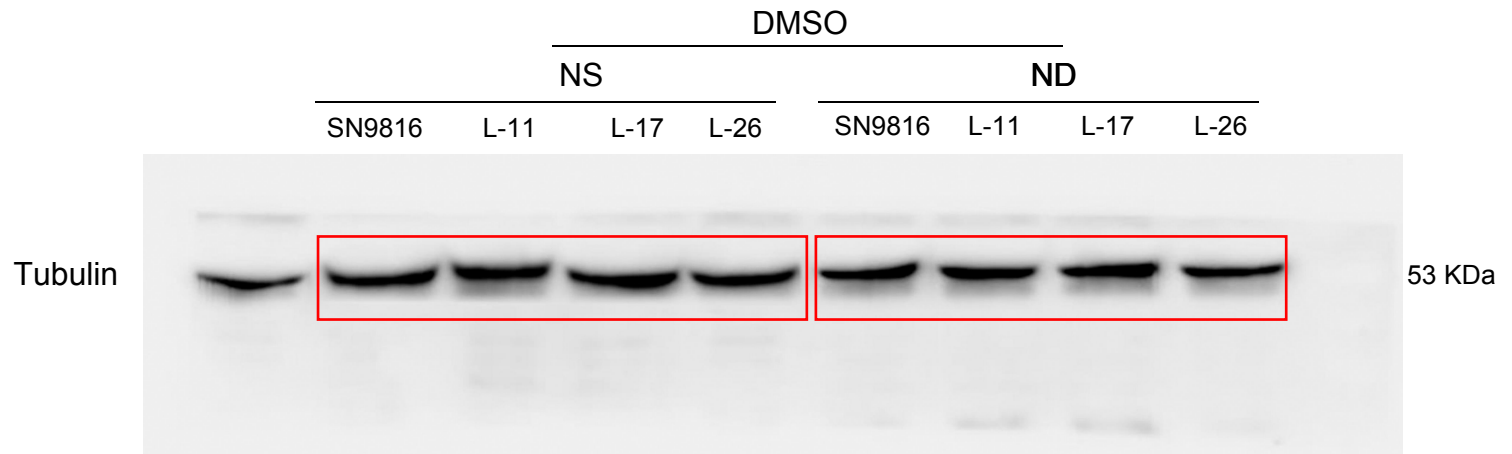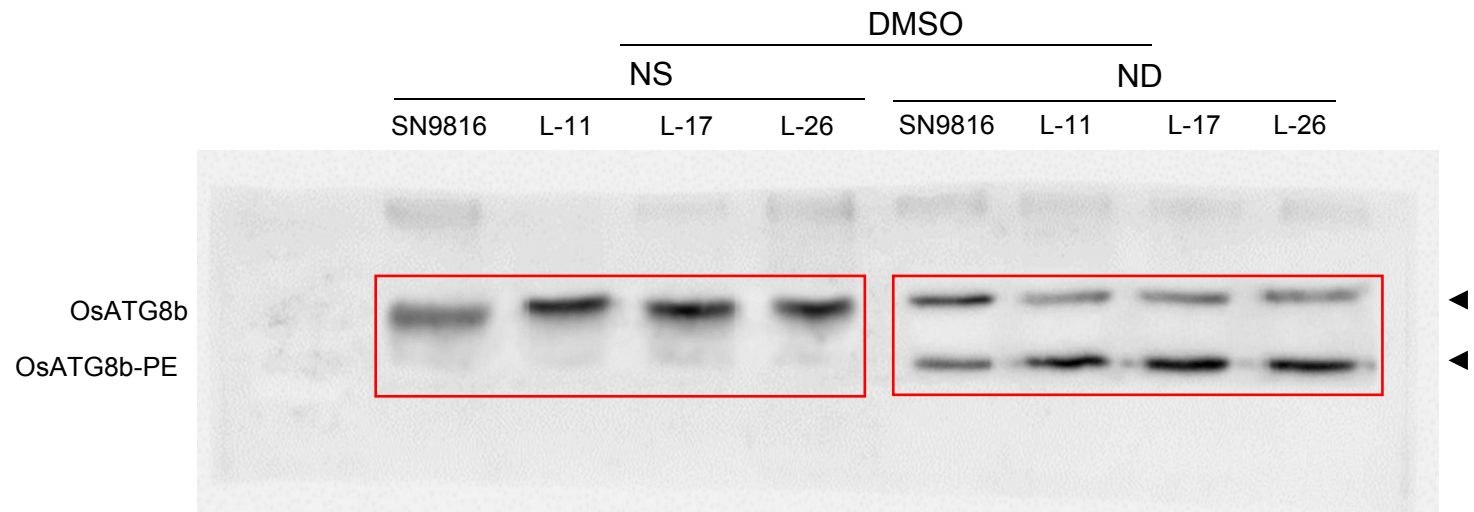

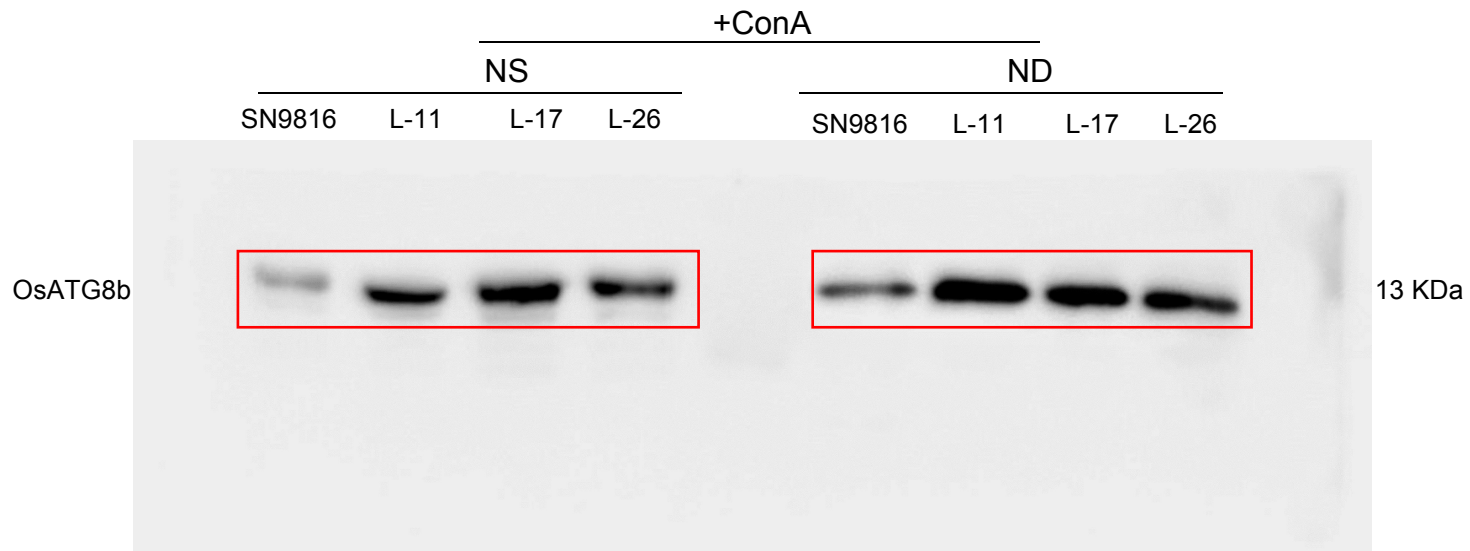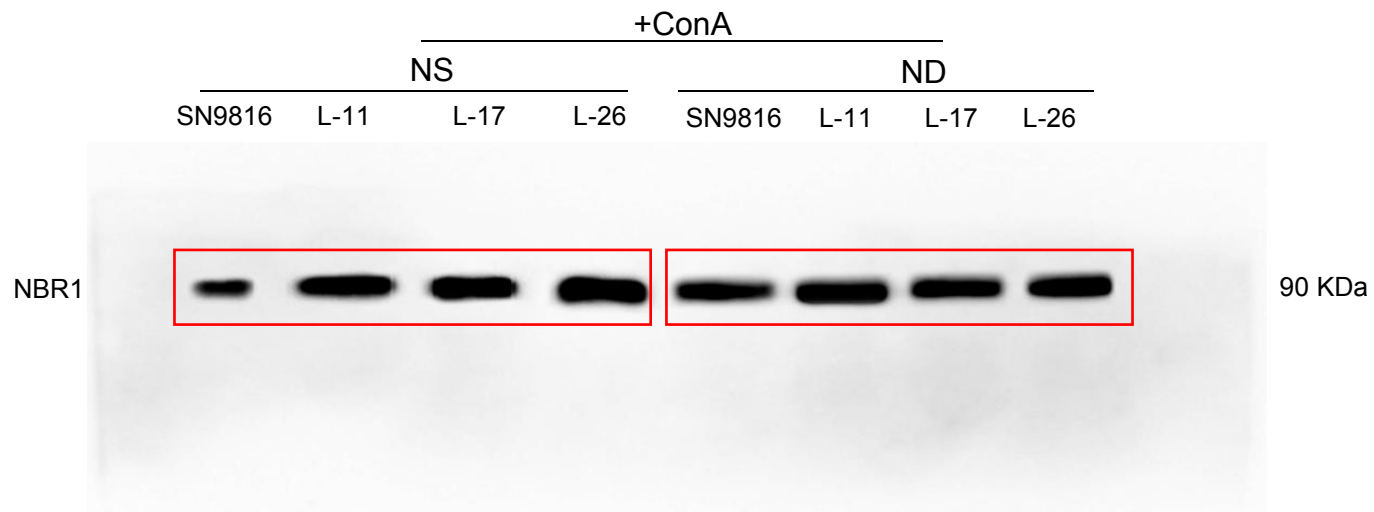

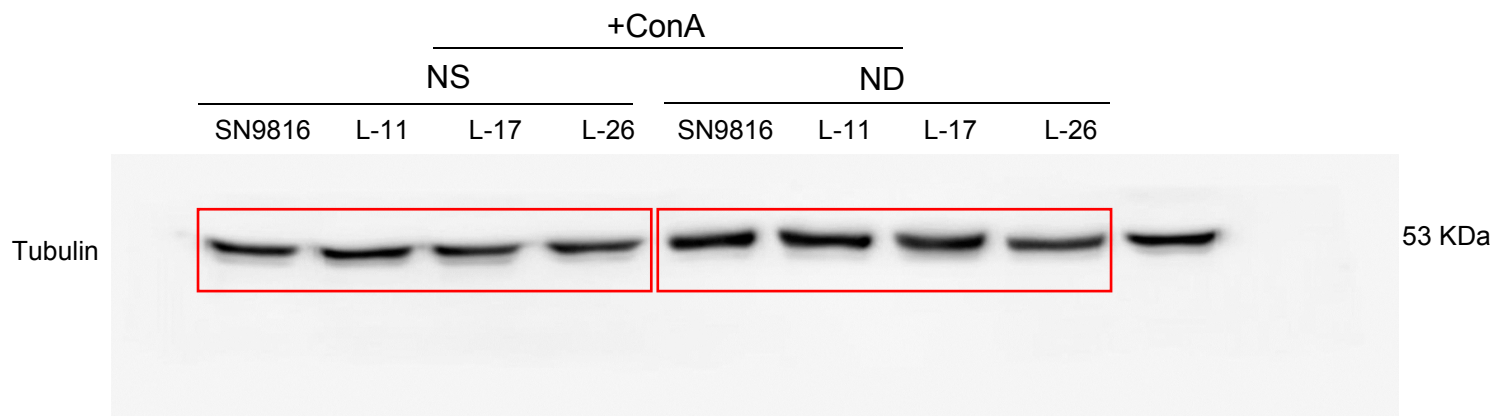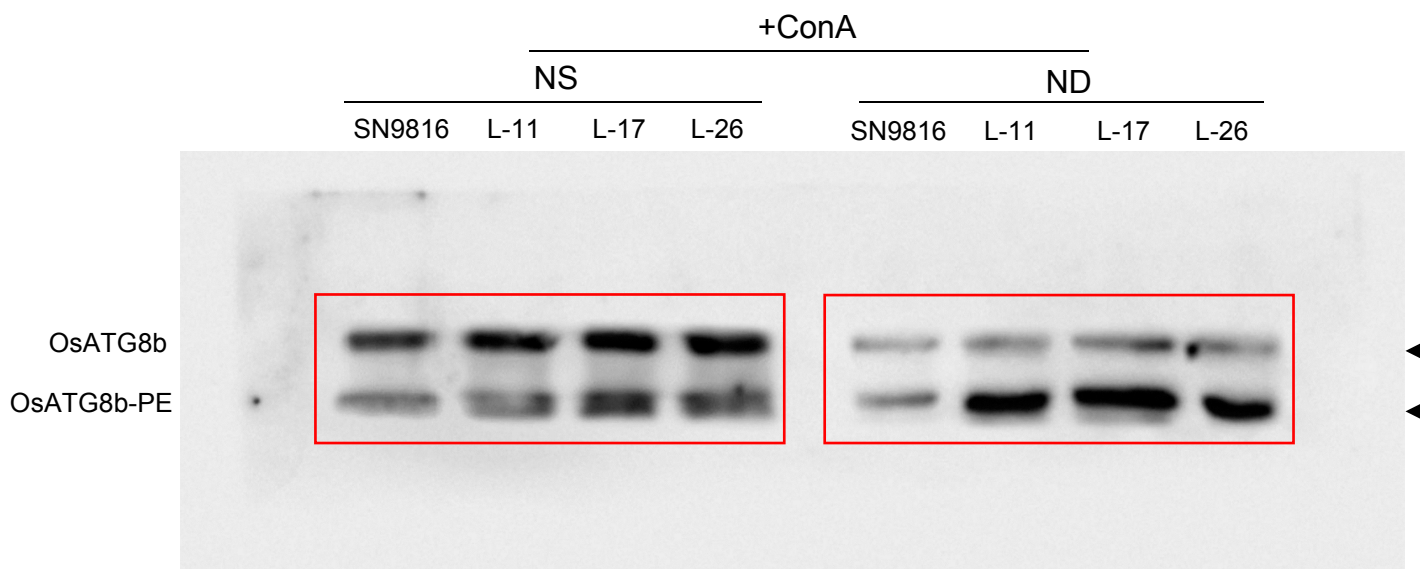

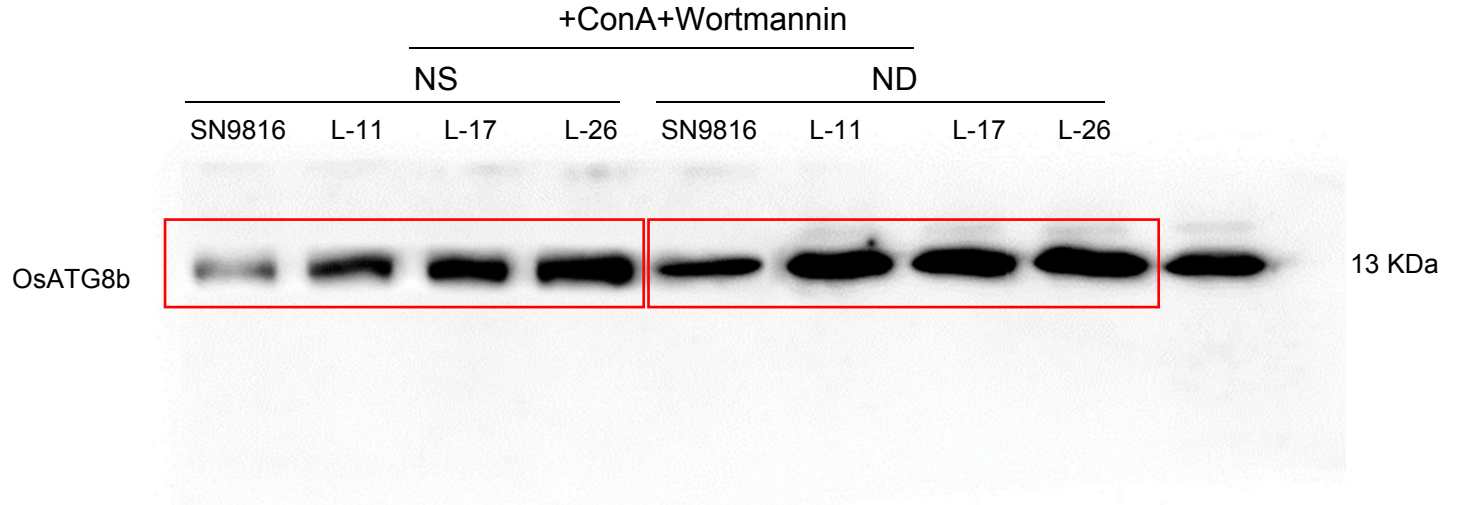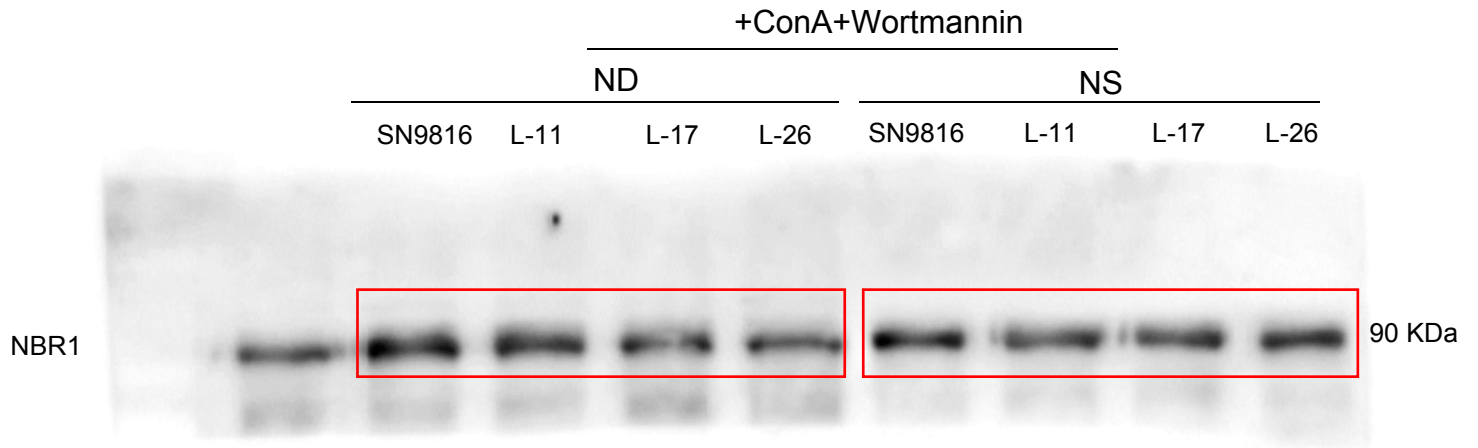

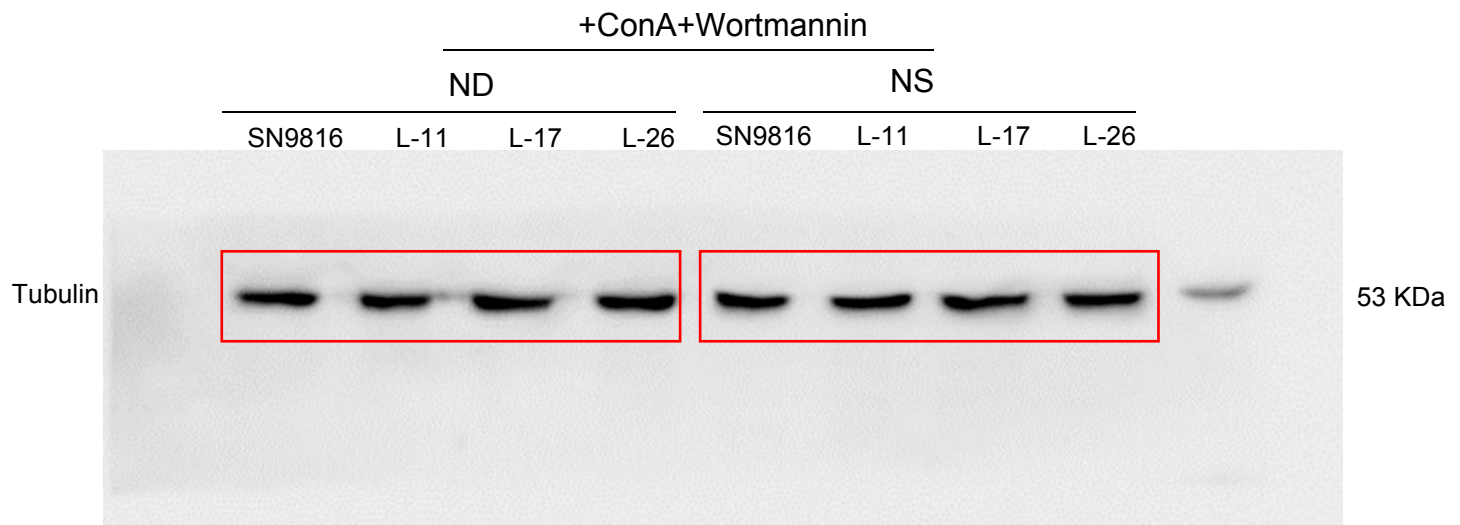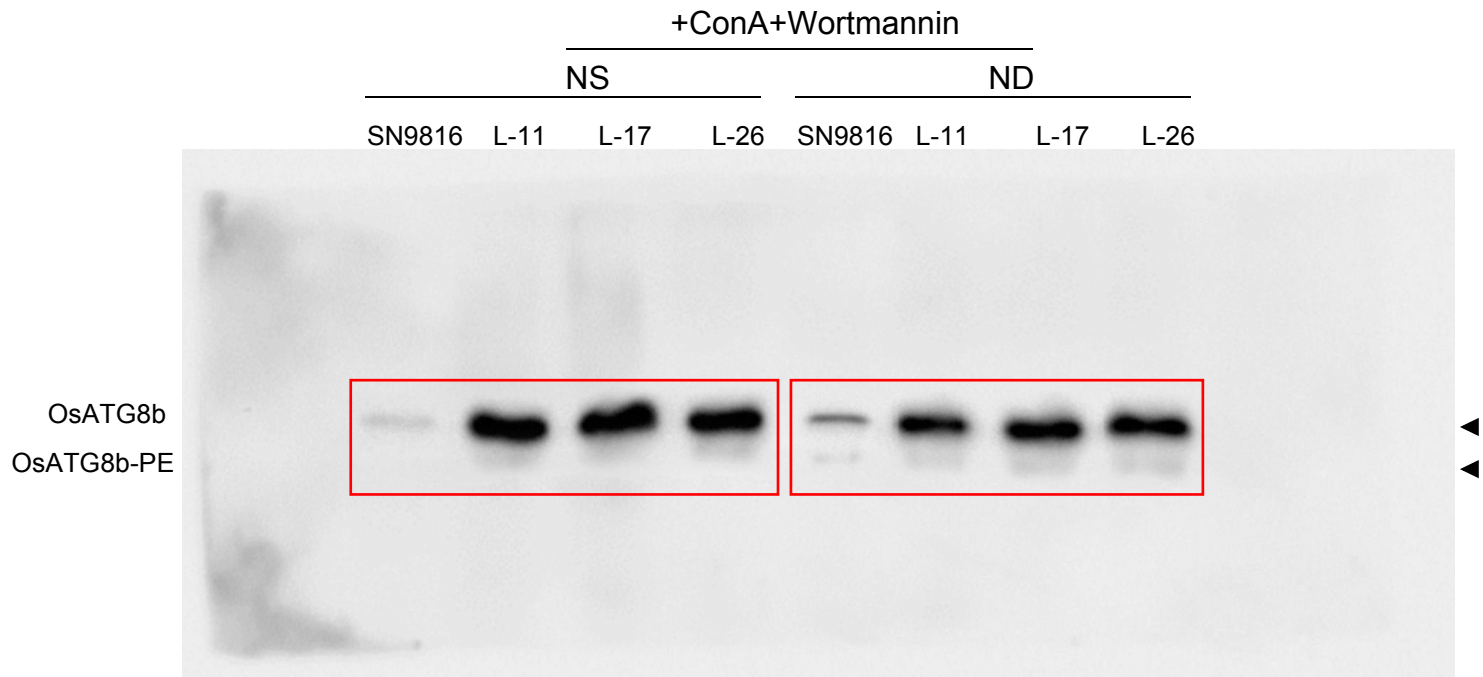

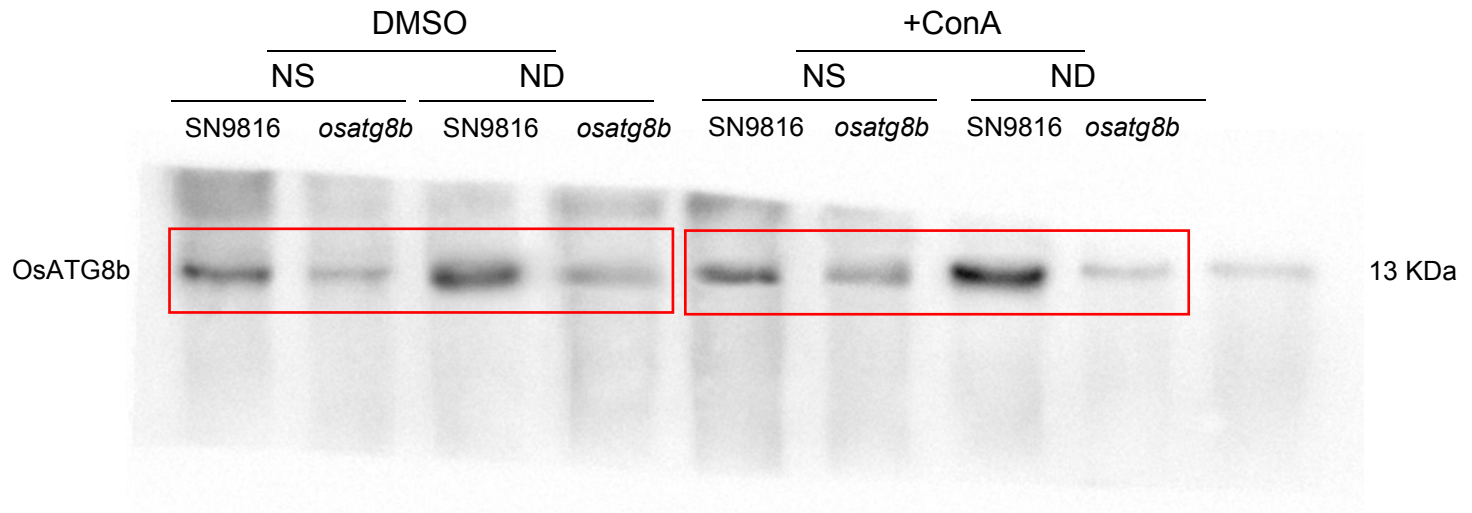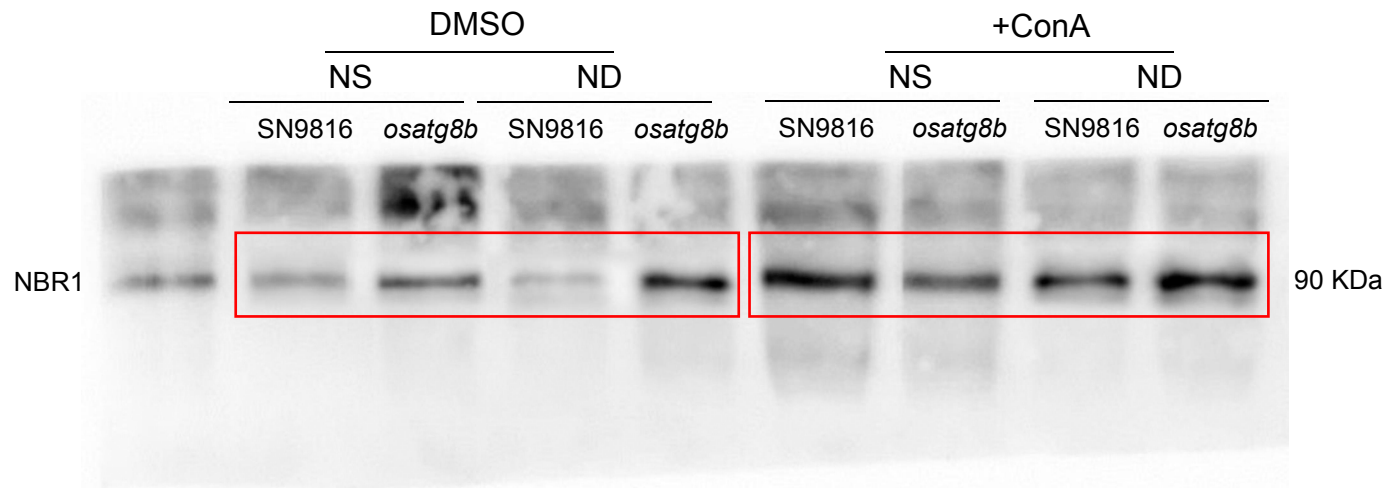



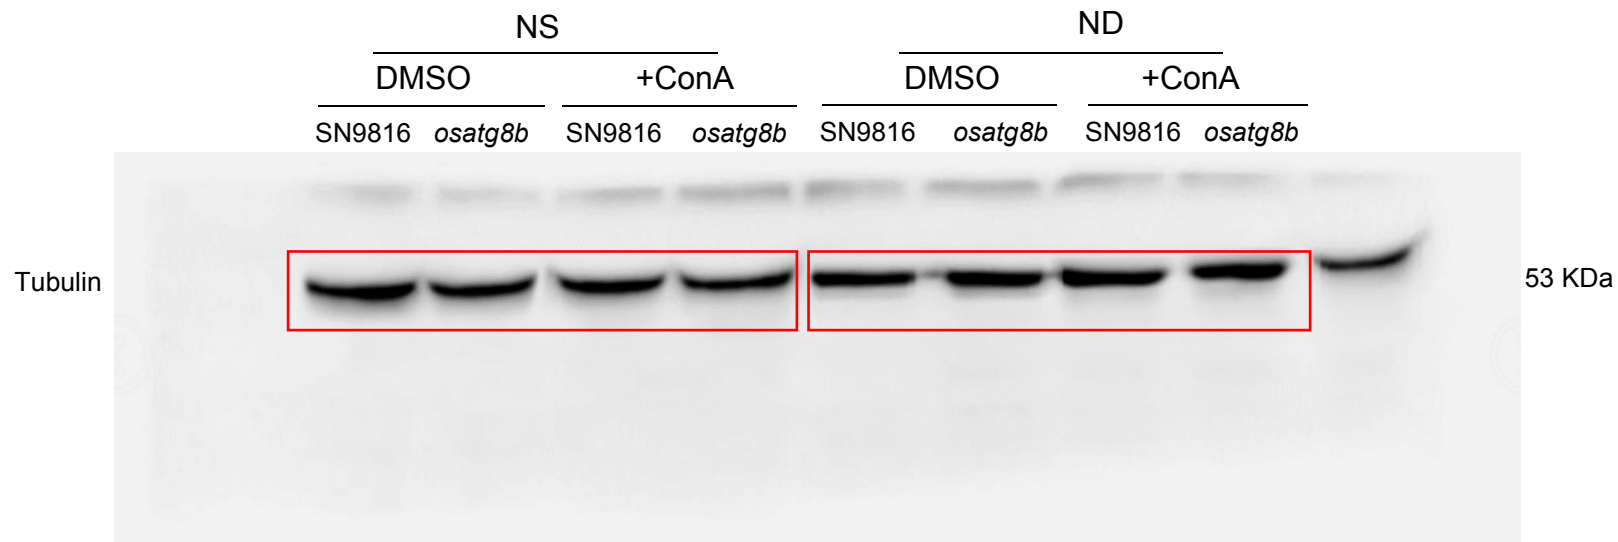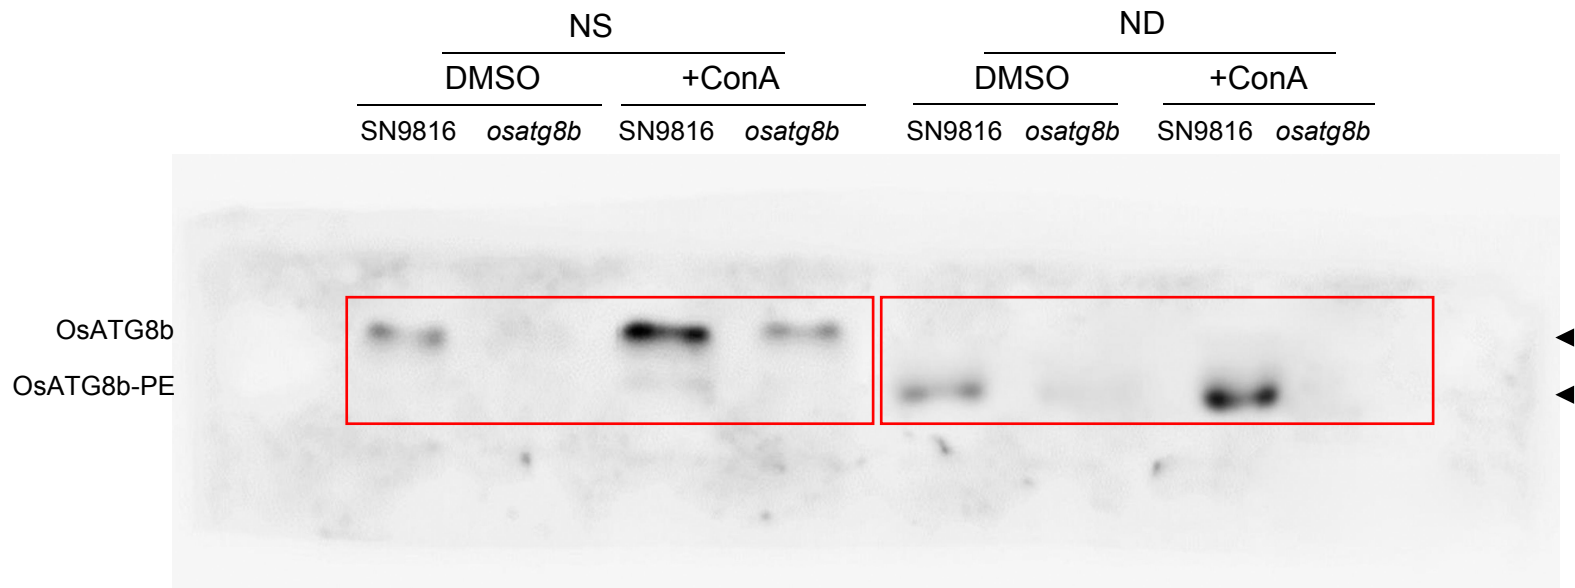



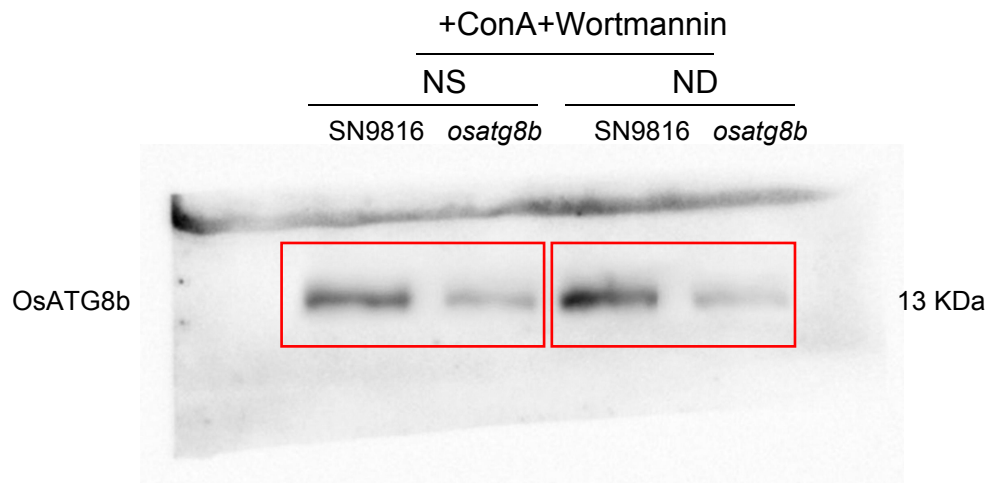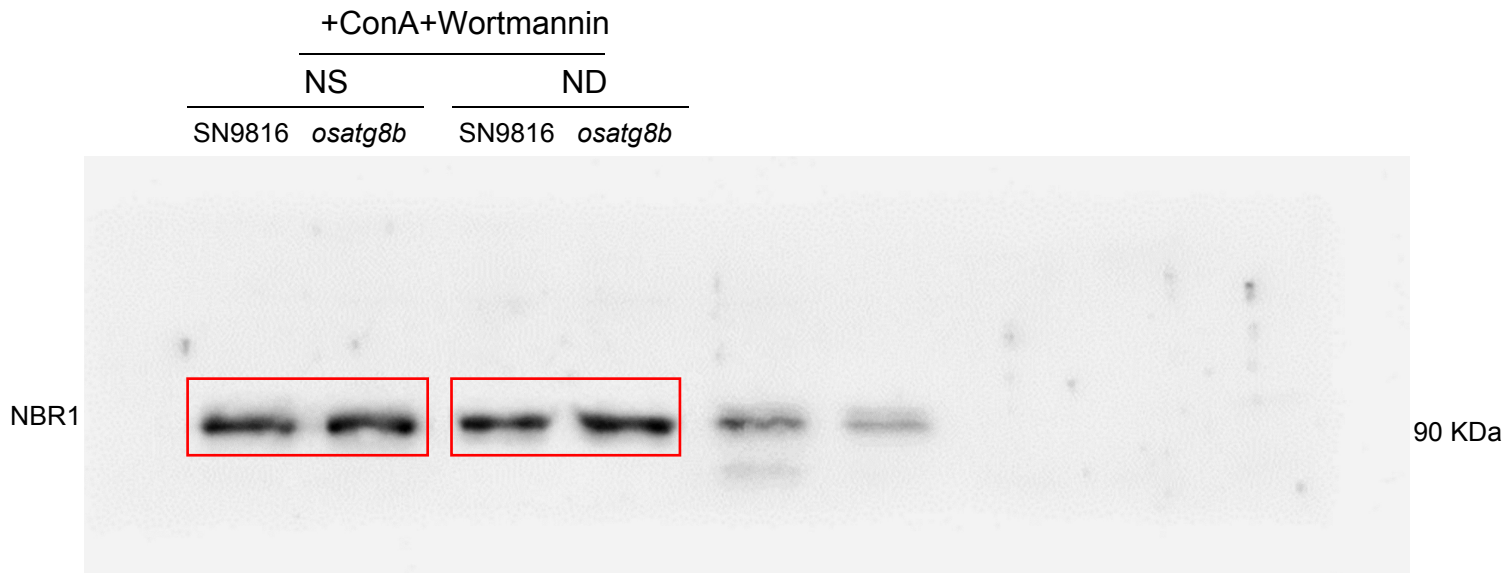

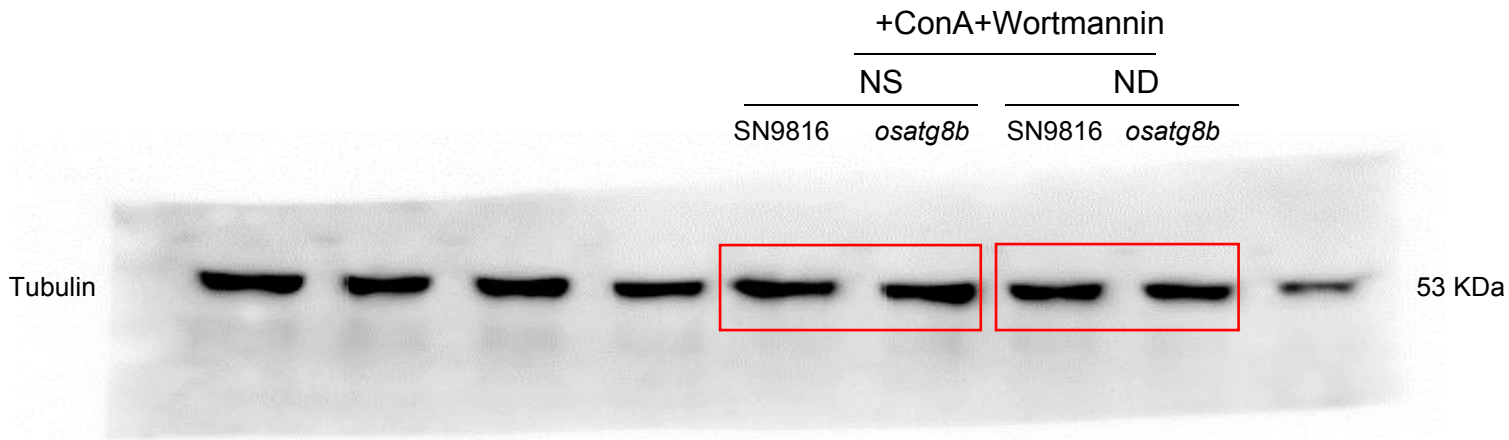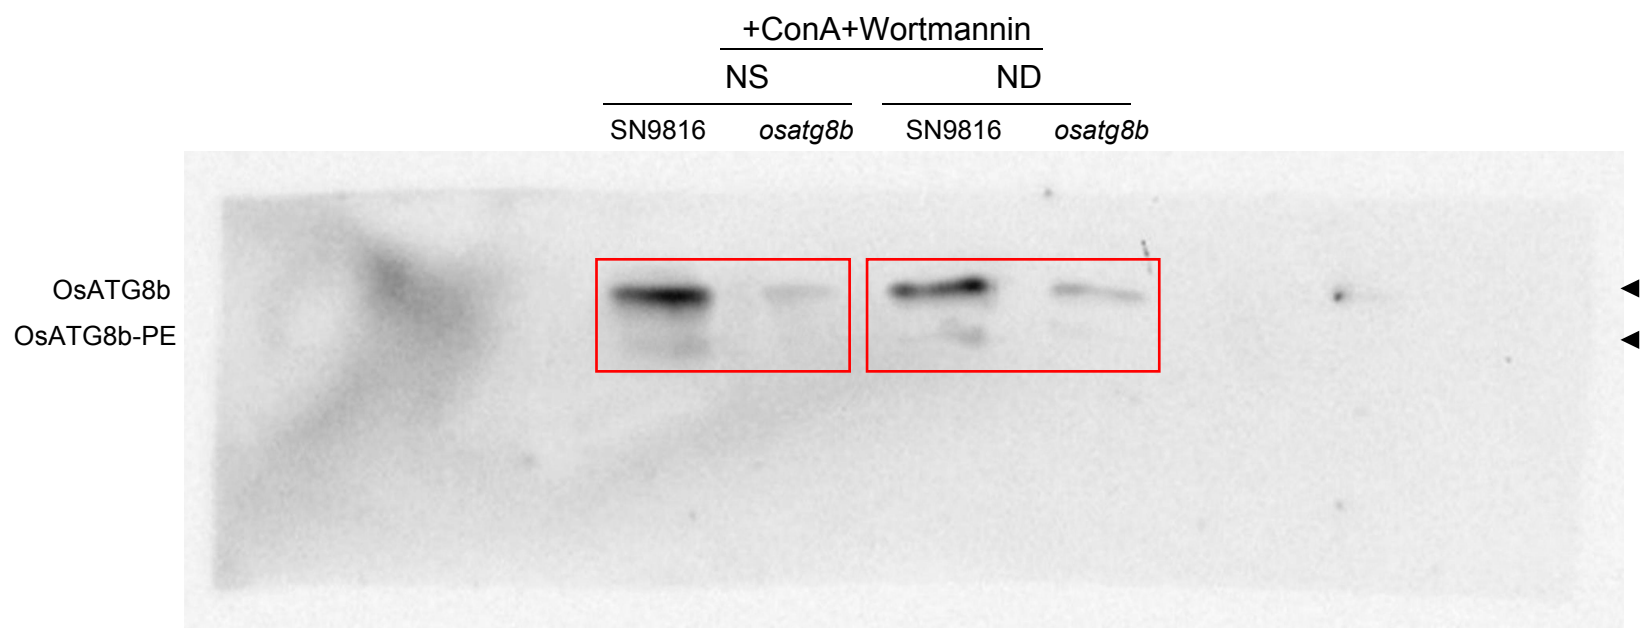

Supplement: pone.0244996.s007.pdf [file pone.0244996.s007.pdf]
